# Supplementary material for: Evolution of river regimes in the Mekong River basin over 8 decades and the role of dams in recent hydrological extremes
Source: Copernicus journal article supplement (doi:10.5194/hess-28-3347-2024), 2024-07-26
Supplement: Supplementary file 1 [file hess-28-3347-2024-supplement.pdf]

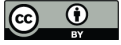

*Supplement of*

## **Evolution of river regimes in the Mekong River basin over 8 decades and the role of dams in recent hydrological extremes**

**Huy Dang and Yadu Pokhrel**

*Correspondence to:* Yadu Pokhrel (ypokhrel@msu.edu)

The copyright of individual parts of the supplement might differ from the article licence.

## Tables

|                                                                                          |   |
|------------------------------------------------------------------------------------------|---|
| <b>Table S1.</b> Selected hydrological monitoring stations. ....                         | 3 |
| <b>Table S2.</b> Selected dams for CaMa-Flood-Dam simulations and their attributes. .... | 3 |

## Figures

|                                                                                                                                                                                                                                                                                                                                                     |    |
|-----------------------------------------------------------------------------------------------------------------------------------------------------------------------------------------------------------------------------------------------------------------------------------------------------------------------------------------------------|----|
| <b>Figure S1.</b> Sample of season separation after applying a 7-days moving window filter to the simulated outflow at Chiang Saen station in year 2000. ....                                                                                                                                                                                       | 7  |
| <b>Figure S2.</b> Comparison of daily observed river flow (black line) with simulated river flow with different runoff and simulation settings (color coded lines) at Luang Prabang station in 2010. Volume difference (VOL), Nash-Sutcliffe coefficient (NSE), Kling-Gupta efficiency (KGE) of each simulation are indicated in the top left. .... | 7  |
| <b>Figure S3.</b> Complete time series validation of daily simulated discharge at selected stations between 1979-2022 from multiple runoff datasets. It should be noted that the simulated results of year 1953 has been removed from further analysis due to problems caused by the ERA5 runoff dataset. ....                                      | 8  |
| <b>Figure S4.</b> Same as Fig. S2 but for 1940-1978; note that HiGW-MAT simulations are not available for this period. ....                                                                                                                                                                                                                         | 9  |
| <b>Figure S5.</b> Complete time series validation of daily simulated water level at selected stations between 1979-2022 from multiple runoff datasets. ....                                                                                                                                                                                         | 10 |
| <b>Figure S6.</b> Same as Fig S4 but for 1940-1978; note that HiGW-MAT simulations are not available for this period. ....                                                                                                                                                                                                                          | 11 |
| <b>Figure S7.</b> Complete time series validation of annual average river flow trend using the Theil-Sen slope estimator with its statistical significance derived by applying the Mann-Kendall test at selected stations between 1979-2022. ....                                                                                                   | 12 |
| <b>Figure S8.</b> Same as Fig. S7 but for annual minimum river flow. ....                                                                                                                                                                                                                                                                           | 12 |
| <b>Figure S9.</b> Same as Fig. S7 but for annual maximum river flow. ....                                                                                                                                                                                                                                                                           | 13 |
| <b>Figure S10.</b> Decadal differences in CMFD simulated annual volume. ....                                                                                                                                                                                                                                                                        | 14 |
| <b>Figure S11.</b> Decadal differences in snowfall from ERA5 dataset. ....                                                                                                                                                                                                                                                                          | 14 |
| <b>Figure S12.</b> Decadal differences in runoff from ERA5 dataset. ....                                                                                                                                                                                                                                                                            | 15 |
| <b>Figure S13.</b> Decadal differences in total precipitation from ERA5 dataset. ....                                                                                                                                                                                                                                                               | 15 |
| <b>Figure S14.</b> Long-term average simulated discharge across the entire Mekong Region and the Tonle Sap, Mekong Delta region. ....                                                                                                                                                                                                               | 16 |
| <b>Fig.S15.</b> Reservoir extents in model setup for simulations. The river network is indicated in blue lines. Dam release gates are indicated in red while the relevant reservoir extend are indicated in dark purple. ....                                                                                                                       | 17 |

**Table S1.** Selected hydrological monitoring stations.

| No. | Name            | Lat     | Lon      | Discharge |            | Water level |            |
|-----|-----------------|---------|----------|-----------|------------|-------------|------------|
|     |                 |         |          | Start     | End        | Start       | End        |
| 1   | Chiang Saen     | 20.2741 | 100.0885 | 1/1/1960  | 9/19/2022  | 4/30/1960   | 9/19/2022  |
| 2   | Luang Prabang   | 19.8928 | 102.1342 | 1/1/1939  | 12/31/2018 | 1/1/1960    | 9/19/2022  |
| 3   | Chiang Khan     | 17.9003 | 101.6699 | 1/1/1967  | 9/19/2022  | 1/1/1965    | 9/19/2022  |
| 4   | Nong Khai       | 17.8814 | 102.7322 | 1/1/1969  | 9/19/2022  | 1/1/1965    | 9/19/2022  |
| 5   | Nakhon Phanom   | 17.4254 | 104.7739 | 1/1/1924  | 9/19/2022  | 4/1/1972    | 9/19/2022  |
| 6   | Mukdahan        | 16.5828 | 104.7332 | 1/1/1923  | 9/19/2022  | 1/1/1960    | 9/19/2022  |
| 7   | Pakse           | 15.0998 | 105.8132 | 1/1/1923  | 9/19/2022  | 1/1/1960    | 9/19/2022  |
| 8   | Stung Treng     | 13.5325 | 105.9502 | 1/1/1910  | 9/19/2022  | 1/1/1910    | 9/19/2022  |
| 9   | Kratie          | 12.4814 | 106.0176 | 1/1/1924  | 9/19/2022  | 1/8/1933    | 9/19/2022  |
| 10  | Chroy Chang Var | 11.5874 | 104.9384 | 1/1/1960  | 12/31/2002 | 1/1/1960    | 12/31/2012 |
| 11  | Kompong Cham    | 11.9110 | 105.3841 | 1/1/1960  | 12/31/2002 | 1/1/1930    | 9/19/2022  |
| 12  | Chau Doc        | 10.7053 | 105.1335 | 1/1/2001  | 12/31/2007 |             |            |
| 13  | Can Tho         | 10.0529 | 105.7871 | 1/1/2001  | 12/31/2007 | 4/1/1979    | 9/19/2022  |

**Table S2.** Selected dams for CaMa-Flood-Dam simulations and their attributes.

| No. | Project name  | Lat   | Lon    | Purpose | COD  | Height (m) | Total storage (FSL, Mm3) |
|-----|---------------|-------|--------|---------|------|------------|--------------------------|
| 1   | A Luoi        | 16.20 | 107.16 | HPD     | 2012 | 49.5       |                          |
| 2   | Battambang 1  | 12.80 | 102.91 | MPD     | 2018 | 56.8       | 193.43                   |
| 3   | Bien Ho       | 14.06 | 108.00 | ID      | 1983 | 21         | 42                       |
| 4   | Buôn Kuốp     | 12.53 | 107.93 | HPD     | 2010 |            | 14                       |
| 5   | Buon Tua Srah | 12.28 | 108.04 | HPD     | 2009 | 80         | 522                      |
| 6   | Chulabhorn    | 16.54 | 101.65 | HPD     | 1972 | 70         | 165                      |
| 7   | Cibihu        | 26.13 | 99.96  | ID      | 1956 |            | 93.22                    |
| 8   | Dachaoshan    | 24.02 | 100.37 | HPD     | 2003 | 111        | 940                      |
| 9   | Dahuaqiao     | 26.31 | 99.14  | HPD     | 2019 | 106        | 293                      |
| 10  | Dak Doa       | 14.18 | 108.11 | HPD     | 2010 | 20         | 29.13                    |
| 11  | Dak N'Teng    | 12.20 | 107.93 | HPD     | 2011 | 31         | 25.49                    |
| 12  | Dak Psi 5     | 14.66 | 107.94 | HPD     | 2012 |            | 3.53                     |
| 13  | Dak Wi        | 14.54 | 107.97 | ID      | 1977 |            | 26.2                     |
| 14  | Dak Yen       | 14.29 | 107.98 | ID      | 2008 | 22.5       | 6.45                     |
| 15  | Don Sahong    | 13.94 | 105.96 | HPD     | 2020 | 22.5       | 25                       |
| 16  | Dong'erhe     | 23.08 | 101.06 | ID      | 1959 | 26.43      | 1070                     |
| 17  | Dray H'Linh 1 | 12.67 | 107.91 | HPD     | 1990 |            | 1                        |
| 18  | Ea Kao        | 12.61 | 108.04 | ID      | 1983 | 17         | 17.74                    |
| 19  | Ea Sup        | 13.07 | 107.89 | ID      | 1980 | 10         | 5.55                     |
| 20  | Ea Sup Thuong | 13.03 | 107.93 | ID      | 2004 | 26         | 146.94                   |

| No. | Project name       | Lat   | Lon    | Purpose | COD  | Height (m) | Total storage (FSL, Mm3) |
|-----|--------------------|-------|--------|---------|------|------------|--------------------------|
| 21  | ErChahe            | 24.44 | 99.86  | HPD     | 2008 | 46         | 10.92                    |
| 22  | Gongguoqiao        | 25.59 | 99.34  | HPD     | 2012 | 105        | 316                      |
| 23  | Guodazhai          | 24.30 | 99.78  | ID      | 2017 | 83.5       | 50.93                    |
| 24  | GuoDuo             | 31.53 | 97.19  | HPD     | 2015 | 93         | 82.72                    |
| 25  | Haixihai           | 26.28 | 99.97  | ID      | 1995 | 21         | 62                       |
| 26  | Hoàng Ân           | 13.82 | 107.95 | ID      | 1976 | 20         | 6.9                      |
| 27  | Houay Ho           | 15.06 | 106.76 | HPD     | 1999 | 79         | 3530                     |
| 28  | Houay Lamphan      | 15.36 | 106.50 | HPD     | 2015 | 75.6       | 141                      |
| 29  | Hua Na             | 15.13 | 104.70 | HPD     | 1995 | 17         |                          |
| 30  | Huai Kum           | 16.41 | 101.79 | HPD     | 1980 | 35.5       | 22                       |
| 31  | Huai Luang         | 17.37 | 102.60 | ID      | 1984 | 12.5       | 113                      |
| 32  | Huangdeng          | 26.56 | 99.12  | HPD     | 2019 | 203        | 1613                     |
| 33  | Jinfeng            | 21.59 | 101.23 | HPD     | 1998 | 45         | 19.48                    |
| 34  | Jinghong           | 22.05 | 100.77 | HPD     | 2008 | 108        |                          |
| 35  | Jinhe              | 30.81 | 97.33  | HPD     | 2004 | 34         | 4.27                     |
| 36  | Kamping Puoy       | 13.08 | 102.97 | ID      | 1977 |            | 110                      |
| 37  | Krông Buk Hạ       | 12.78 | 108.37 | ID      | 2013 | 35.45      | 109.34                   |
| 38  | Lam Chamuak        | 15.08 | 102.49 | ID      | 1992 | 18         | 26                       |
| 39  | Lam Nang Rong      | 14.30 | 102.76 | ID      | 1982 | 23         | 150                      |
| 40  | Lam Pao            | 16.60 | 103.45 | ID      | 1968 | 33         | 1340                     |
| 41  | Lam Phra Phloeng   | 14.59 | 101.84 | ID      | 1967 | 50         | 110                      |
| 42  | Lam Plai Mat       | 14.30 | 102.44 | ID      | 1988 | 44.6       | 98                       |
| 43  | Lam Sae            | 14.42 | 102.27 | ID      | 1988 | 29.5       | 275                      |
| 44  | Lam Ta Khong P.S.  | 14.87 | 101.56 | HPD     | 1974 | 40.3       | 310                      |
| 45  | Laoyinyan          | 24.47 | 99.82  | HPD     | 1997 | 4.23       | 1092                     |
| 46  | Lidi               | 27.85 | 99.03  | HPD     | 2019 | 75         | 75                       |
| 47  | Lower Sesan 2      | 13.55 | 106.26 | HPD     | 2018 | 75         | 2715                     |
| 48  | Luozahe 1          | 24.51 | 100.45 | HPD     | 2016 | 59         | 14.33                    |
| 49  | Luozahe 2          | 24.49 | 100.40 | HPD     | 2017 | 71         | 3391                     |
| 50  | Manfeilong         | 21.91 | 100.78 | ID      | 1958 |            | 10.64                    |
| 51  | Manman             | 21.88 | 100.21 | ID      | 1970 |            | 14.5                     |
| 52  | Manwan             | 24.62 | 100.45 | HPD     | 1995 | 132        | 1006                     |
| 53  | Mengbang Reservoir | 21.92 | 100.28 | ID      | 1958 |            | 17.86                    |
| 54  | Menglun            | 21.93 | 101.18 | ID      | 2011 |            | 6.8                      |
| 55  | Miaowei            | 25.85 | 99.16  | HPD     | 2017 | 139.8      | 660                      |
| 56  | Mun Bon            | 14.48 | 102.15 | ID      | 1980 | 32.7       | 141                      |
| 57  | Nam Beng           | 19.95 | 101.24 | HPD     | 2017 | 25.5       | 3611                     |
| 58  | Nam Chian 1        | 19.15 | 103.56 | HPD     | 2018 | 93         | 23.12                    |
| 59  | Nam Houm           | 18.18 | 102.47 | ID      | 1981 | 22         | 42                       |
| 60  | Nam Khan 2         | 19.69 | 102.37 | HPD     | 2016 | 160        | 528                      |

| No. | Project name | Lat   | Lon    | Purpose | COD  | Height (m) | Total storage (FSL, Mm3) |
|-----|--------------|-------|--------|---------|------|------------|--------------------------|
| 61  | Nam Khan 3   | 19.75 | 102.22 | HPD     | 2016 | 90         | 860.5                    |
| 62  | Nam Kong 1   | 14.54 | 106.74 | HPD     | 2021 | 80         | 505                      |
| 63  | Nam Kong 2   | 14.49 | 106.86 | HPD     | 2018 | 50         | 71.4                     |
| 64  | Nam Kong 3   | 14.57 | 106.91 | HPD     | 2021 | 65         | 471                      |
| 65  | Nam Leuk     | 18.44 | 102.95 | HPD     | 2000 | 51.5       | 185                      |
| 66  | Nam Lik 1    | 18.62 | 102.39 | HPD     | 2019 | 36.5       | 6.8                      |
| 67  | Nam Lik 1-2  | 18.79 | 102.12 | HPD     | 2010 | 103        | 11.13                    |
| 68  | Nam Mang 1   | 18.53 | 103.20 | HPD     | 2017 | 70         | 16.52                    |
| 69  | Nam Mang 3   | 18.35 | 102.77 | HPD     | 2005 | 28         | 49.43                    |
| 70  | Nam Nga 2    | 20.18 | 101.92 | HPD     | 2017 | 47         | 157.7                    |
| 71  | Nam Ngiep 1  | 18.65 | 103.55 | HPD     | 2019 | 167        | 1192                     |
| 72  | Nam Ngiep 2  | 19.30 | 103.35 | HPD     | 2015 | 70.5       | 163                      |
| 73  | Nam Ngiep 3A | 19.24 | 103.28 | HPD     | 2014 | 30         |                          |
| 74  | Nam Ngum 1   | 18.53 | 102.55 | HPD     | 1971 | 75         | 4700                     |
| 75  | Nam Ngum 2   | 18.76 | 102.78 | HPD     | 2013 | 181        | 3590                     |
| 76  | Nam Ngum 5   | 19.36 | 102.62 | HPD     | 2012 | 99         | 314                      |
| 77  | Nam Ou 1     | 20.09 | 102.27 | HPD     | 2020 | 65         | 89.1                     |
| 78  | Nam Ou 2     | 20.41 | 102.47 | HPD     | 2016 | 49         | 121.7                    |
| 79  | Nam Ou 3     | 20.70 | 102.67 | HPD     | 2020 | 72         | 181                      |
| 80  | Nam Ou 4     | 21.12 | 102.49 | HPD     | 2020 | 47         | 141.6                    |
| 81  | Nam Ou 5     | 21.41 | 102.34 | HPD     | 2016 | 74         | 335                      |
| 82  | Nam Ou 6     | 21.78 | 102.20 | HPD     | 2016 | 88         | 409                      |
| 83  | Nam Ou 7     | 22.08 | 102.26 | HPD     | 2020 | 143        | 1770                     |
| 84  | Nam Pha Gnai | 19.01 | 102.87 | HPD     | 2020 | 70         |                          |
| 85  | Nam Pung     | 16.97 | 103.98 | MPD     | 1965 | 41         | 165                      |
| 86  | Nam San 3A   | 19.13 | 103.66 | HPD     | 2016 | 75         | 123                      |
| 87  | Nam San 3B   | 19.09 | 103.62 | HPD     | 2015 |            | 11.7                     |
| 88  | Nam Tha 1    | 20.27 | 100.87 | HPD     | 2019 | 93.65      | 1755                     |
| 89  | Nam Theun 1  | 18.36 | 104.15 | HPD     | 2022 | 177        | 3009                     |
| 90  | Nam Theun 2  | 18.00 | 104.95 | HPD     | 2010 | 48         | 3500                     |
| 91  | Nam Un       | 17.30 | 103.76 | ID      | 1973 | 29.5       | 520                      |
| 92  | Nandeng      | 23.70 | 99.89  | MPD     | 2010 | 89         | 51.49                    |
| 93  | Nanhe 1      | 24.34 | 100.01 | HPD     | 2009 | 56.8       | 11.36                    |
| 94  | Nuozadu      | 22.64 | 100.44 | HPD     | 2014 | 261.5      | 23703                    |
| 95  | Pak Mun      | 15.28 | 105.47 | HPD     | 1994 | 17         | 0.13                     |
| 96  | Plei Krong   | 14.41 | 107.86 | HPD     | 2008 | 65         | 1048.7                   |
| 97  | Pleipai      | 13.49 | 107.90 | ID      | 2011 | 16.5       | 13.28                    |
| 98  | Sesan 3      | 14.22 | 107.72 | HPD     | 2006 | 79         | 3.8                      |
| 99  | Sesan 3A     | 14.11 | 107.66 | HPD     | 2007 | 35         | 239                      |
| 100 | Sesan 4      | 13.97 | 107.50 | HPD     | 2009 | 74         | 893                      |

| No. | Project name       | Lat   | Lon    | Purpose | COD  | Height (m) | Total storage (FSL, Mm3) |
|-----|--------------------|-------|--------|---------|------|------------|--------------------------|
| 101 | Sesan 4a           | 13.93 | 107.47 | HPD     | 2011 | 17.3       | 13.13                    |
| 102 | Siridhorn          | 15.21 | 105.43 | HPD     | 1971 | 42         | 1967                     |
| 103 | Srepok 3           | 12.75 | 107.88 | HPD     | 2009 | 52.5       | 219                      |
| 104 | Srepok 4           | 12.81 | 107.86 | HPD     | 2011 | 155        |                          |
| 105 | Theun-Hinboun      | 18.26 | 104.56 | HPD     | 1998 | 27         |                          |
| 106 | Theun-Hinboun exp. | 18.30 | 104.64 | HPD     | 2013 | 65         | 2450                     |
| 107 | Ubol Ratana        | 16.78 | 102.62 | HPD     | 1966 | 35.1       | 2559                     |
| 108 | Upper Kontum       | 14.69 | 108.23 | HPD     | 2021 |            | 145.52                   |
| 109 | Weiyuanjiang       | 23.28 | 100.56 | HPD     | 2014 |            | 274                      |
| 110 | Wunonglong         | 27.93 | 98.93  | HPD     | 2019 | 137        | 284                      |
| 111 | Xayaburi           | 19.25 | 101.81 | HPD     | 2019 | 32.6       | 1300                     |
| 112 | Xe Lanong 1        | 16.36 | 106.24 | HPD     | 2021 |            | 373                      |
| 113 | Xekaman 1          | 14.96 | 107.16 | HPD     | 2016 | 120        | 3340                     |
| 114 | Xekaman 3          | 15.43 | 107.36 | HPD     | 2013 | 101.5      | 141.5                    |
| 115 | Xekaman-Sanxay     | 14.89 | 107.12 | HPD     | 2018 | 28         |                          |
| 116 | Xepian-Xenamnoy    | 14.95 | 106.63 | HPD     | 2019 | 75.5       | 1092                     |
| 117 | Xeset 1            | 15.49 | 106.28 | HPD     | 1990 | 18         |                          |
| 118 | Xeset 2            | 15.40 | 106.28 | HPD     | 2009 | 26         | 9                        |
| 119 | Xiangshui          | 23.77 | 100.63 | ID      | 1989 | 54         | 56.7                     |
| 120 | Xiaowan            | 24.70 | 100.09 | HPD     | 2010 | 292        | 15043                    |
| 121 | Xi'er He 2         | 25.56 | 100.13 | HPD     | 1987 | 37.25      | 0.2                      |
| 122 | Xi'er He 4         | 25.58 | 100.07 | HPD     | 1971 |            | 14                       |
| 123 | Ximahe             | 22.78 | 100.98 | ID      | 1956 |            | 420                      |
| 124 | Xinfang Reservoir  | 22.72 | 100.96 | ID      | 1958 |            | 7.1                      |
| 125 | XunCun             | 25.42 | 99.99  | HPD     | 1999 | 67         | 73.74                    |
| 126 | Yali               | 14.23 | 107.83 | HPD     | 2001 | 65         | 1037.09                  |

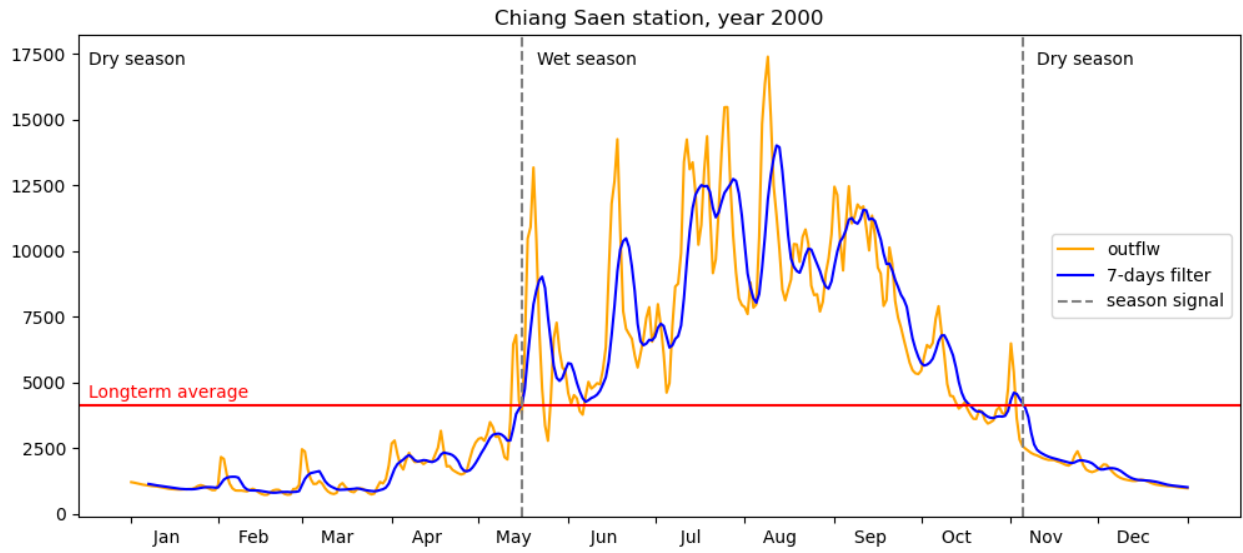

**Figure S1.** Sample of season separation after applying a 7-days moving window filter to the simulated outflow at Chiang Saen station in year 2000.

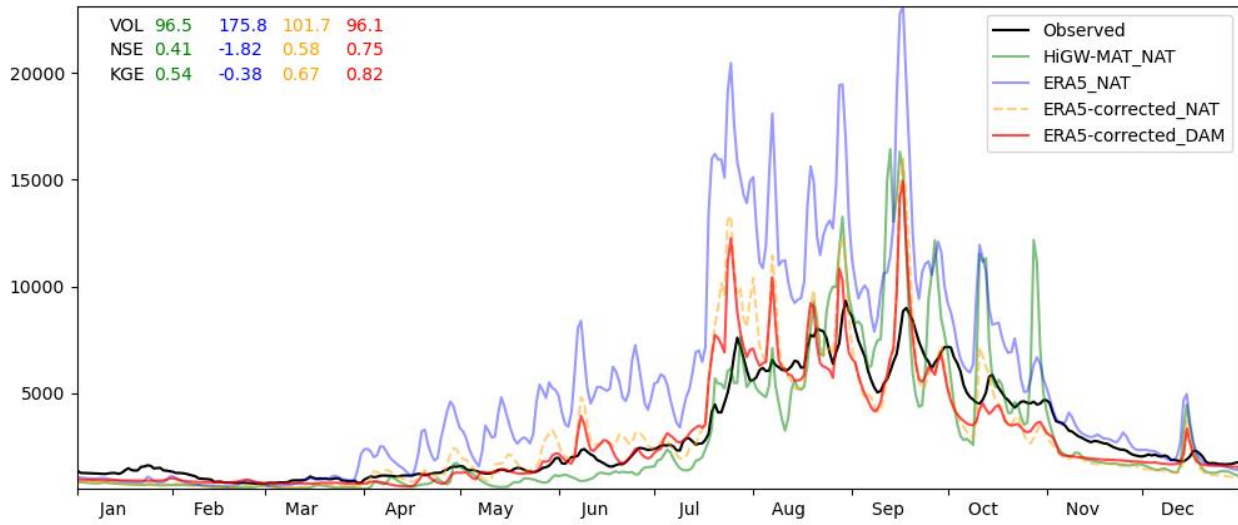

**Figure S2.** Comparison of daily observed river flow (black line) with simulated river flow with different runoff and simulation settings (color coded lines) at Luang Prabang station in 2010. Volume difference (VOL), Nash-Sutcliffe coefficient (NSE), Kling-Gupta efficiency (KGE) of each simulation are indicated in the top left.

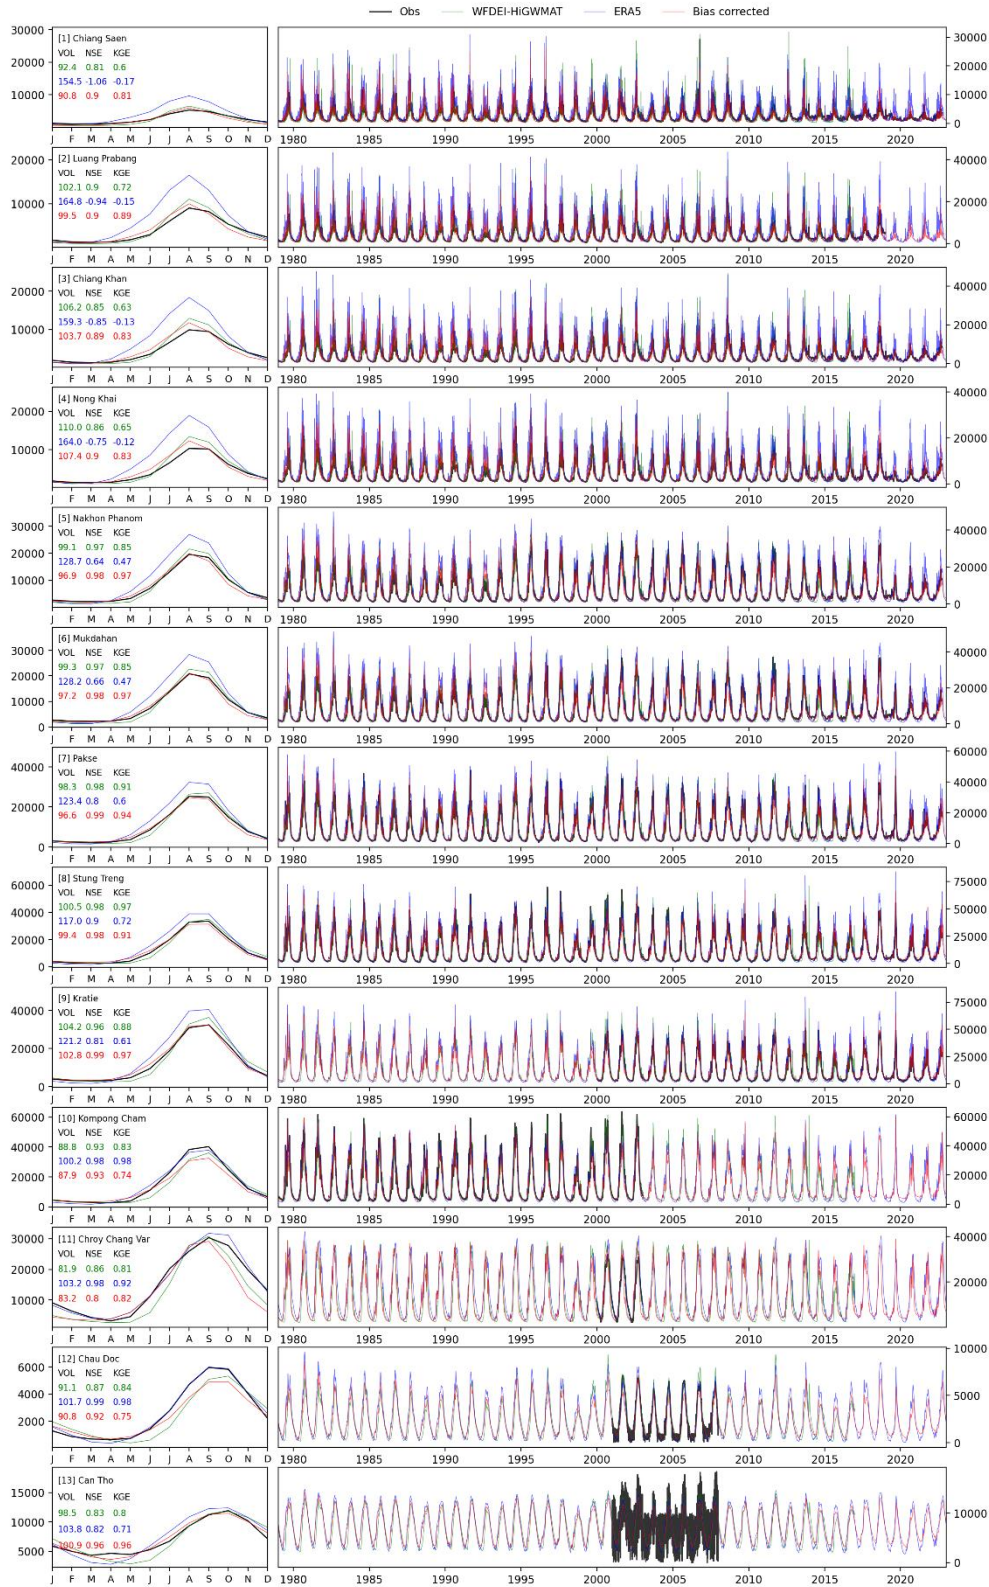

**Figure S3.** Complete time series validation of daily simulated discharge at selected stations between 1979-2022 from multiple runoff datasets. It should be noted that the simulated results of year 1953 has been removed from further analysis due to problems caused by the ERA5 runoff dataset.



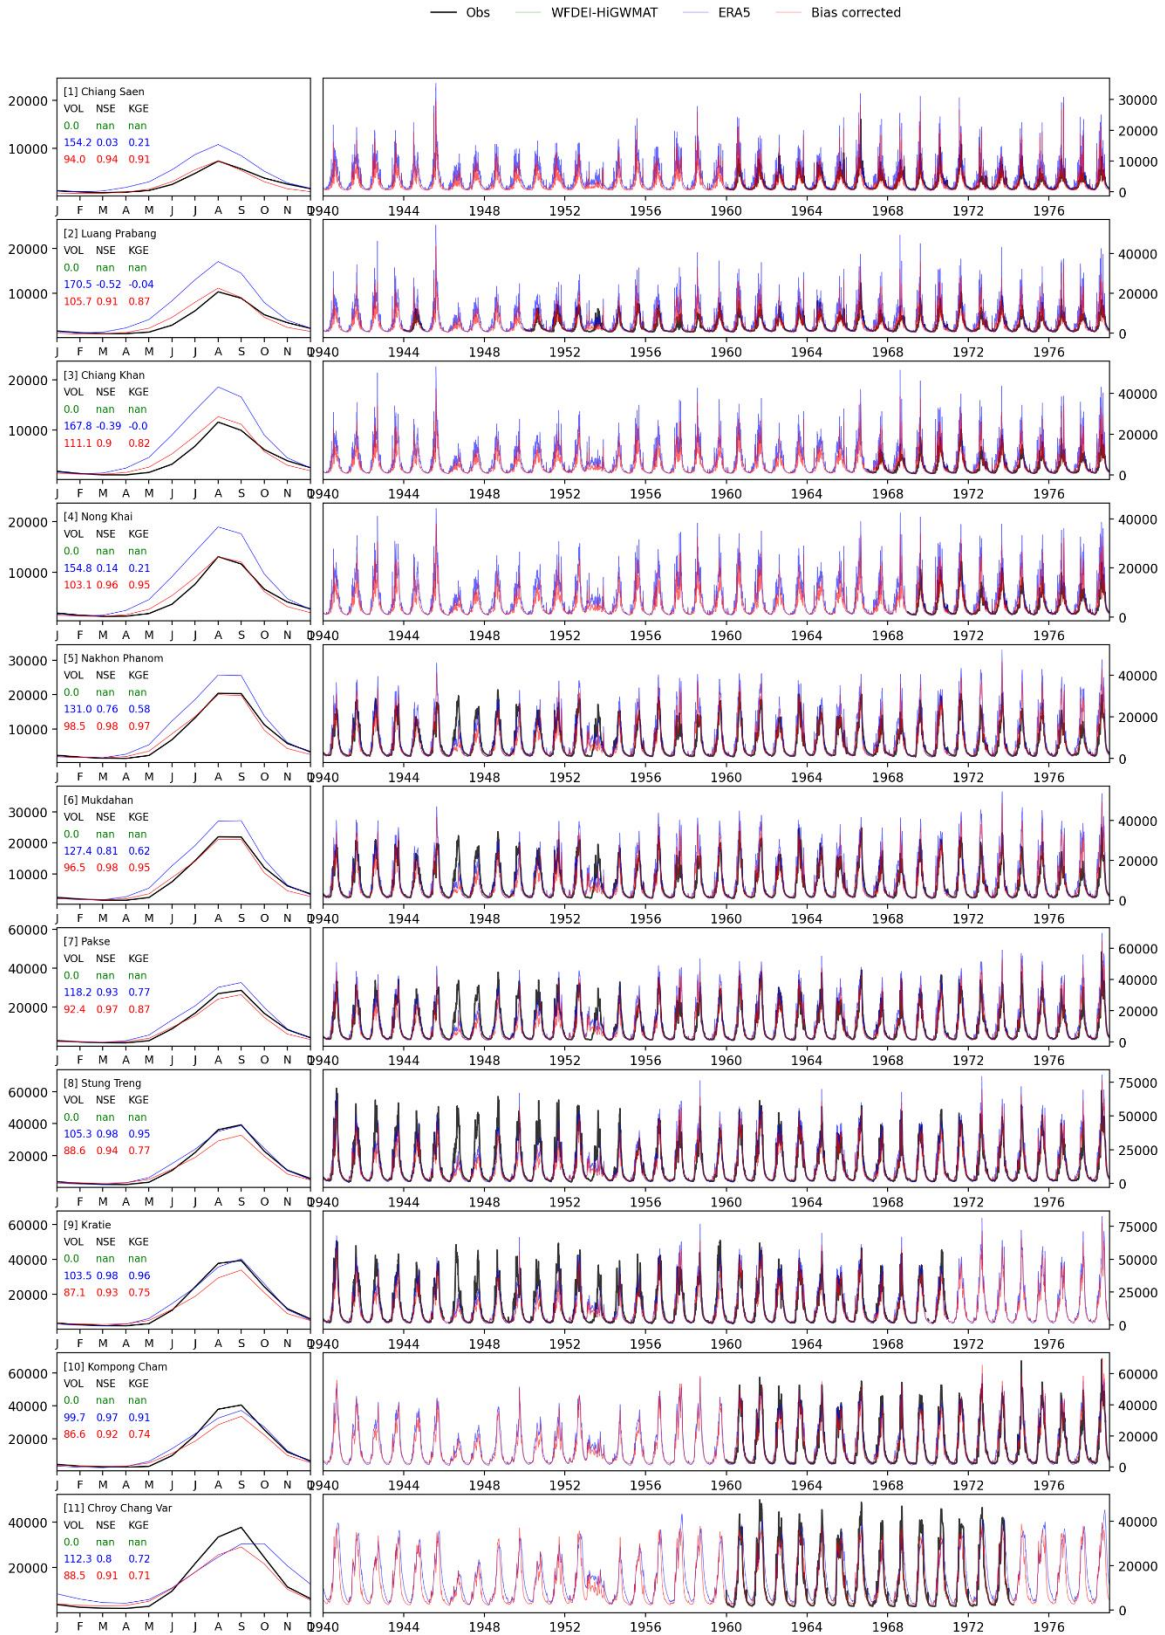

**Figure S4.** Same as Fig. S2 but for 1940-1978; note that HiGW-MAT simulations are not available for this period.

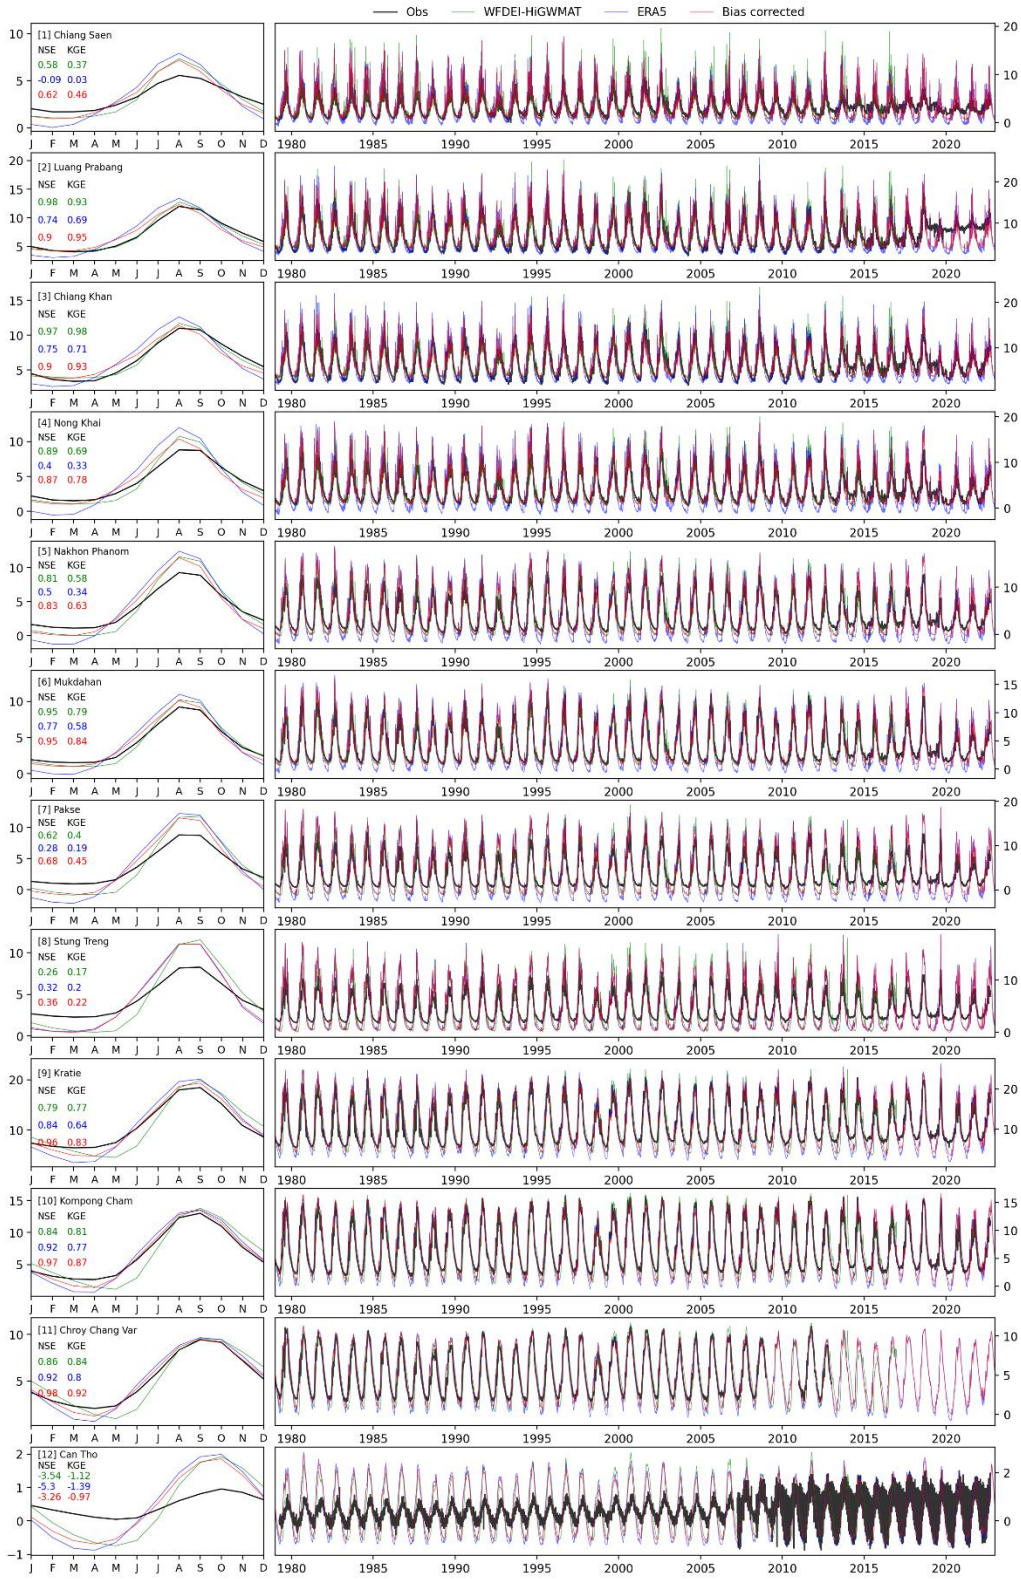

**Figure S5.** Complete time series validation of daily simulated water level at selected stations between 1979-2022 from multiple runoff datasets.

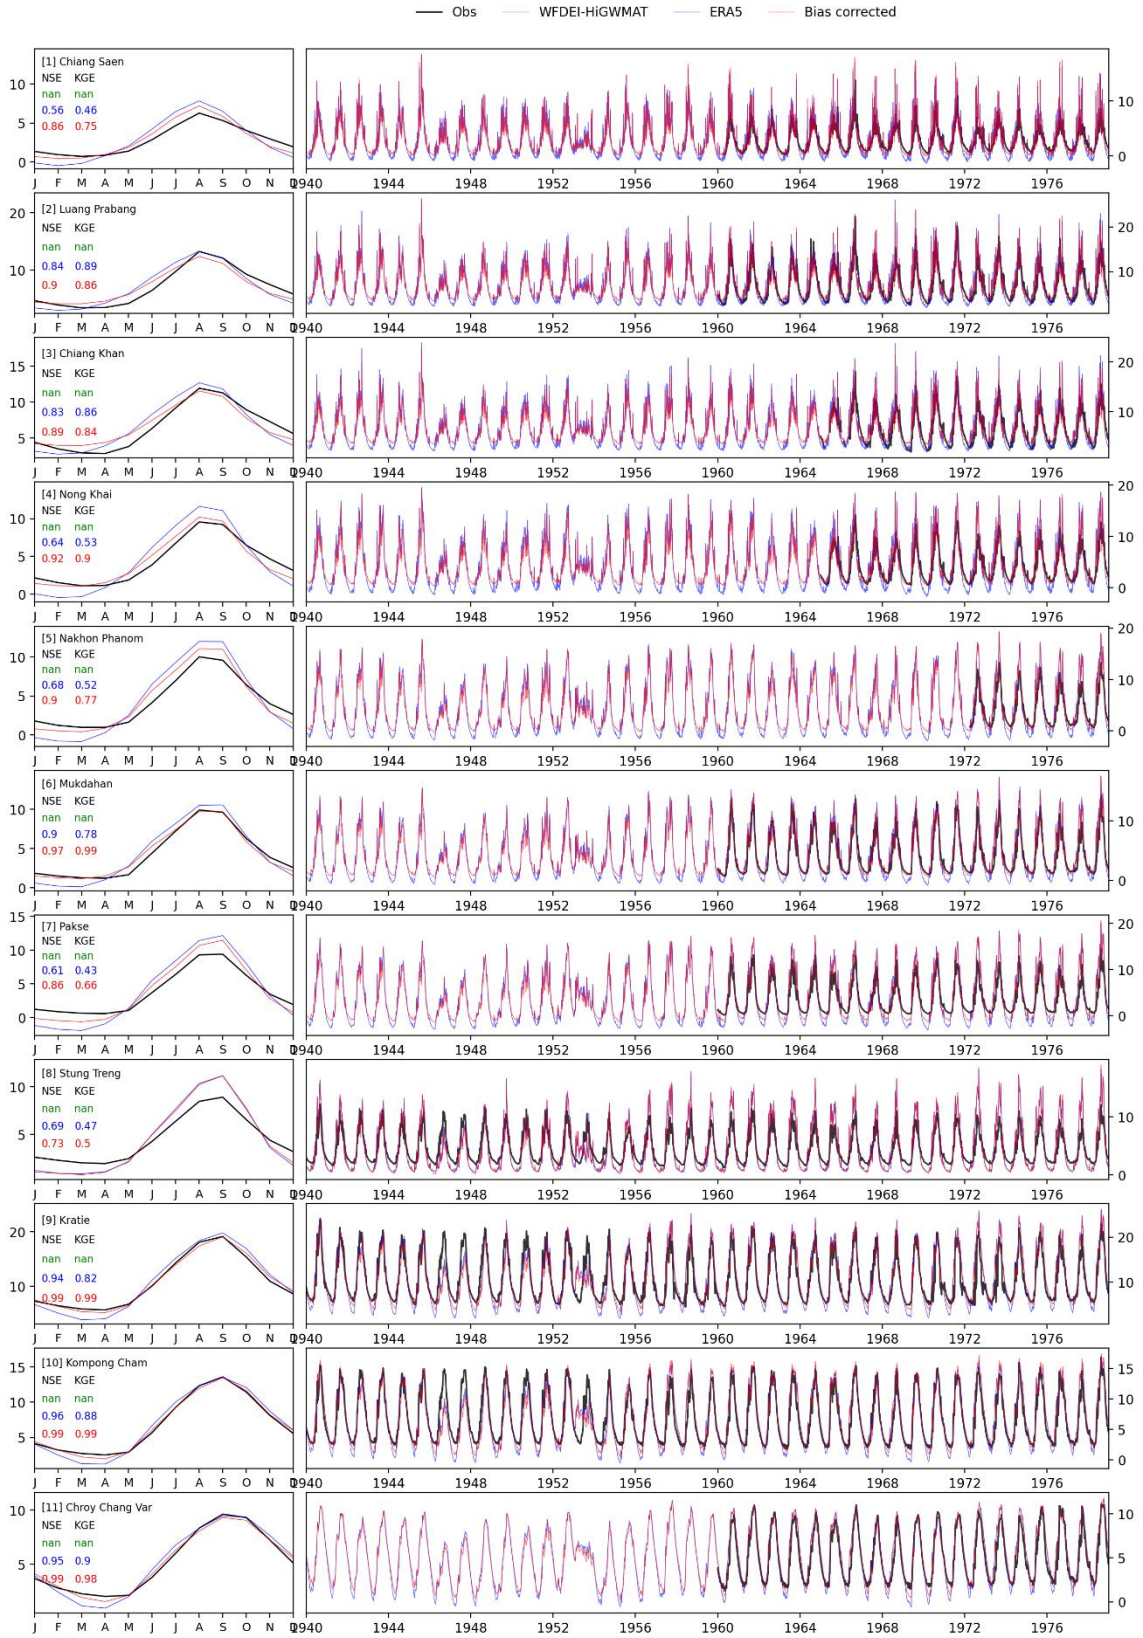

**Figure S6.** Same as Fig S4 but for 1940-1978; note that HiGW-MAT simulations are not available for this period.

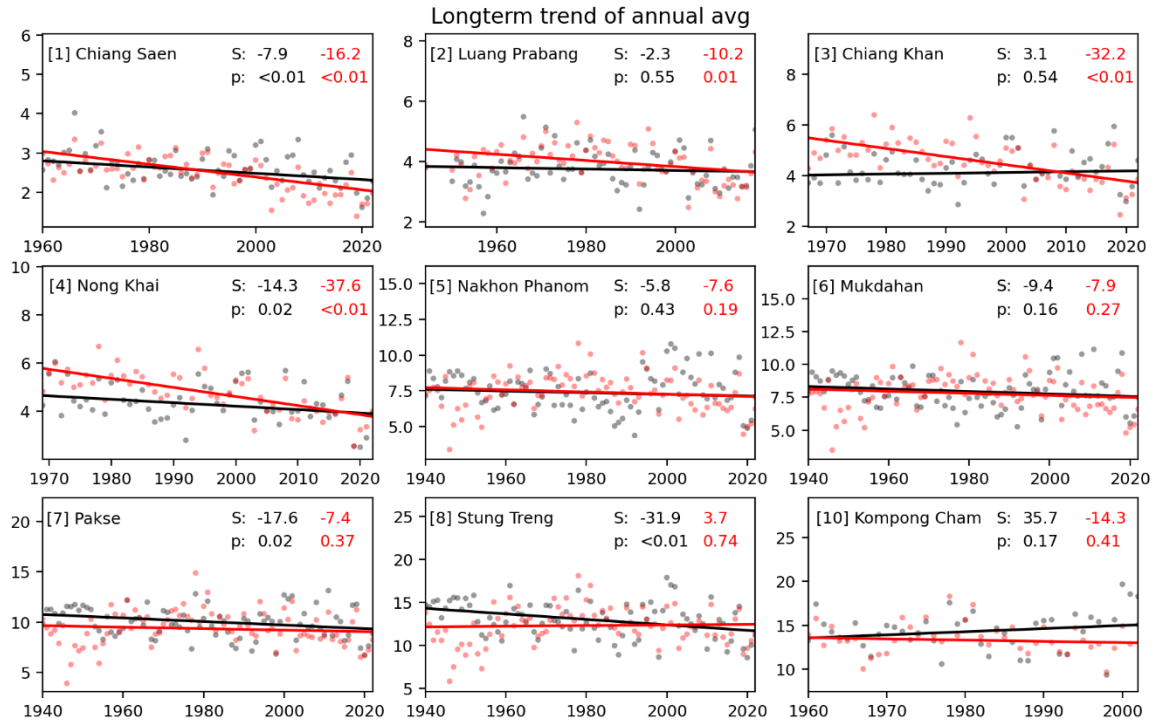

**Figure S7.** Complete time series validation of annual average river flow trend using the Theil-Sen slope estimator with its statistical significance derived by applying the Mann-Kendall test at selected stations between 1979-2022.

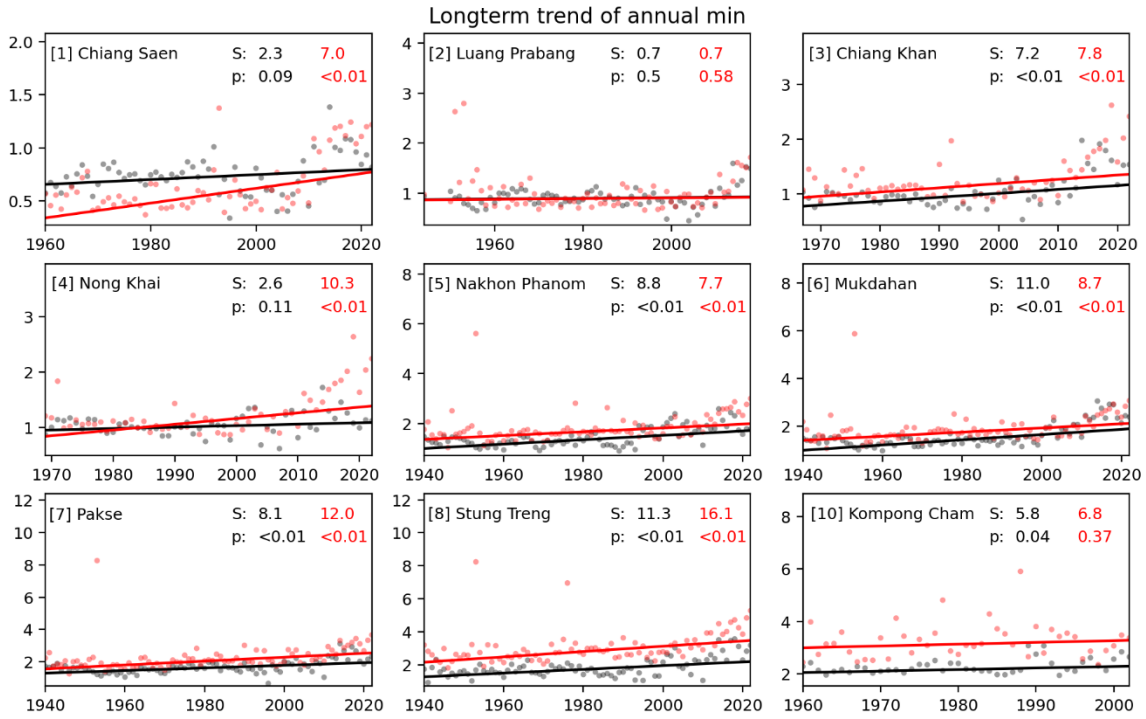

**Figure S8.** Same as Fig. S7 but for annual minimum river flow.

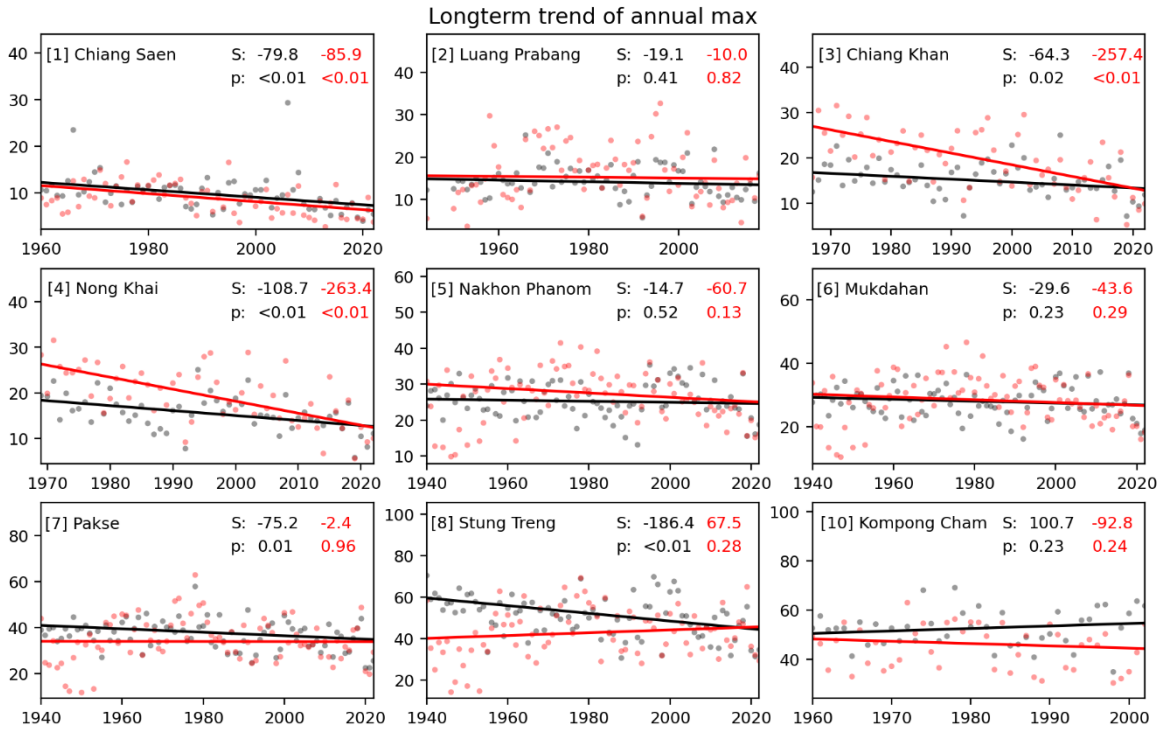

Figure S9. Same as Fig. S7 but for annual maximum river flow.

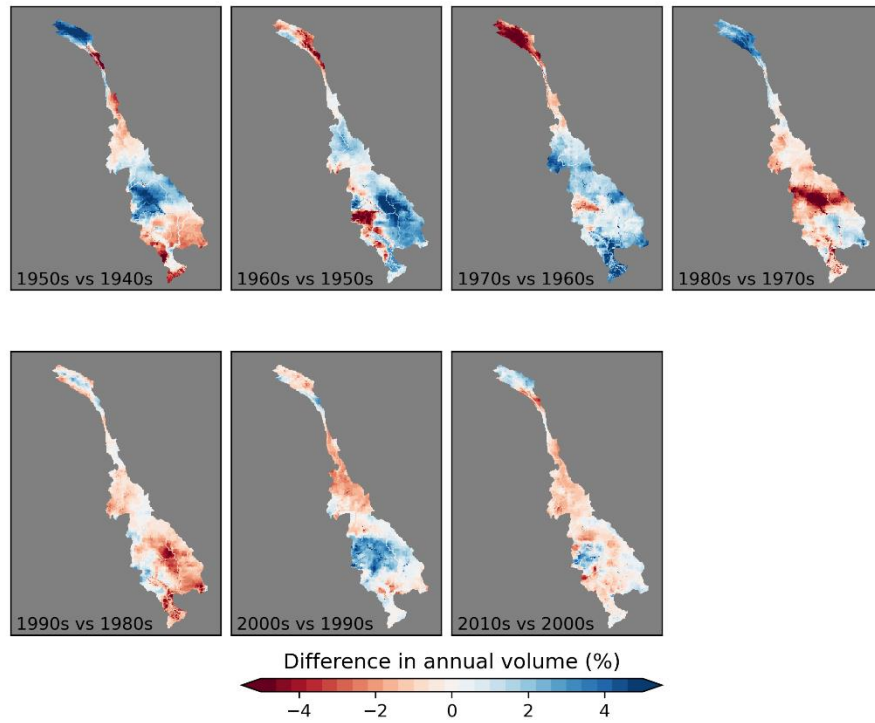

**Figure S10.** Decadal differences in CMFD simulated annual volume.

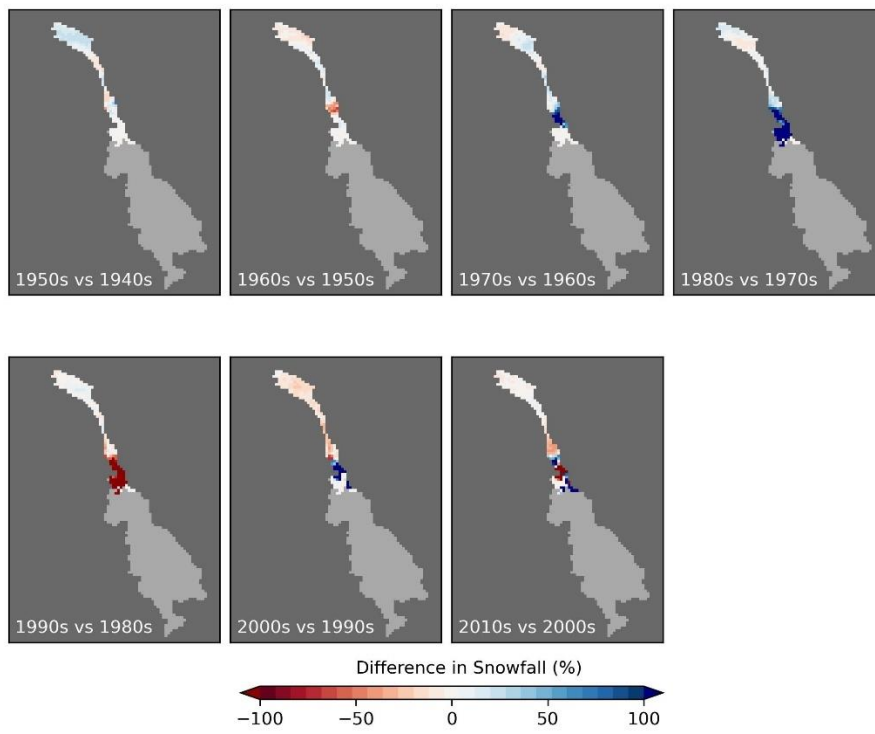

**Figure S11.** Decadal differences in snowfall from ERA5 dataset.

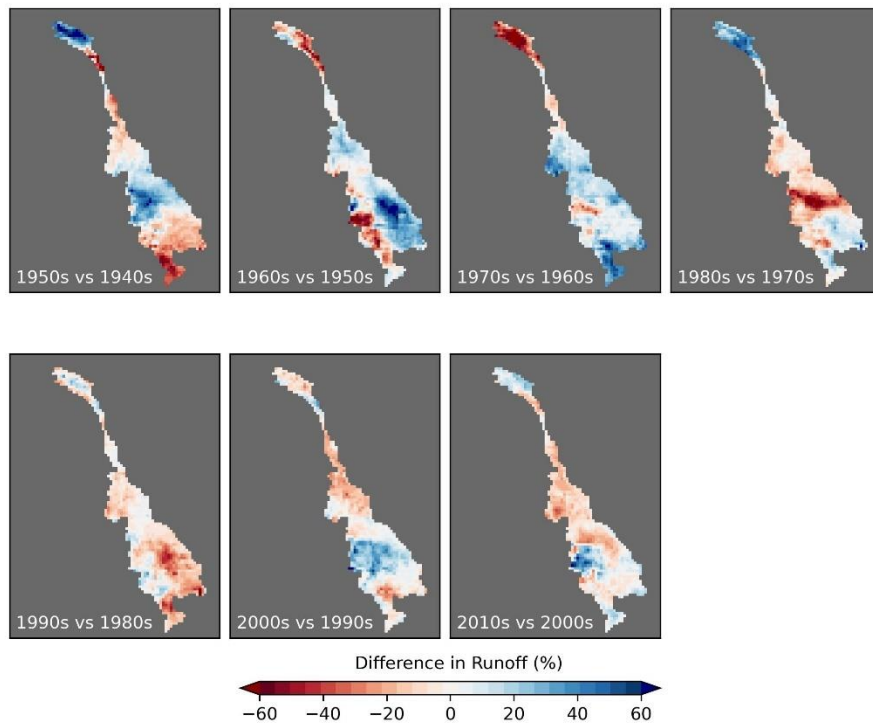

**Figure S12.** Decadal differences in runoff from ERA5 dataset.

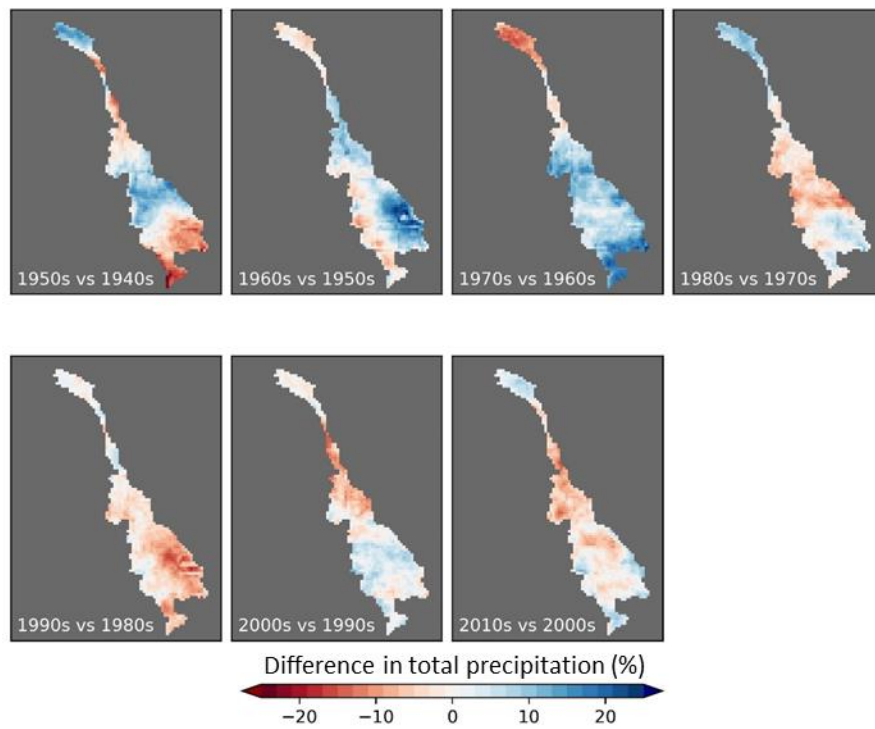

**Figure S13.** Decadal differences in total precipitation from ERA5 dataset.

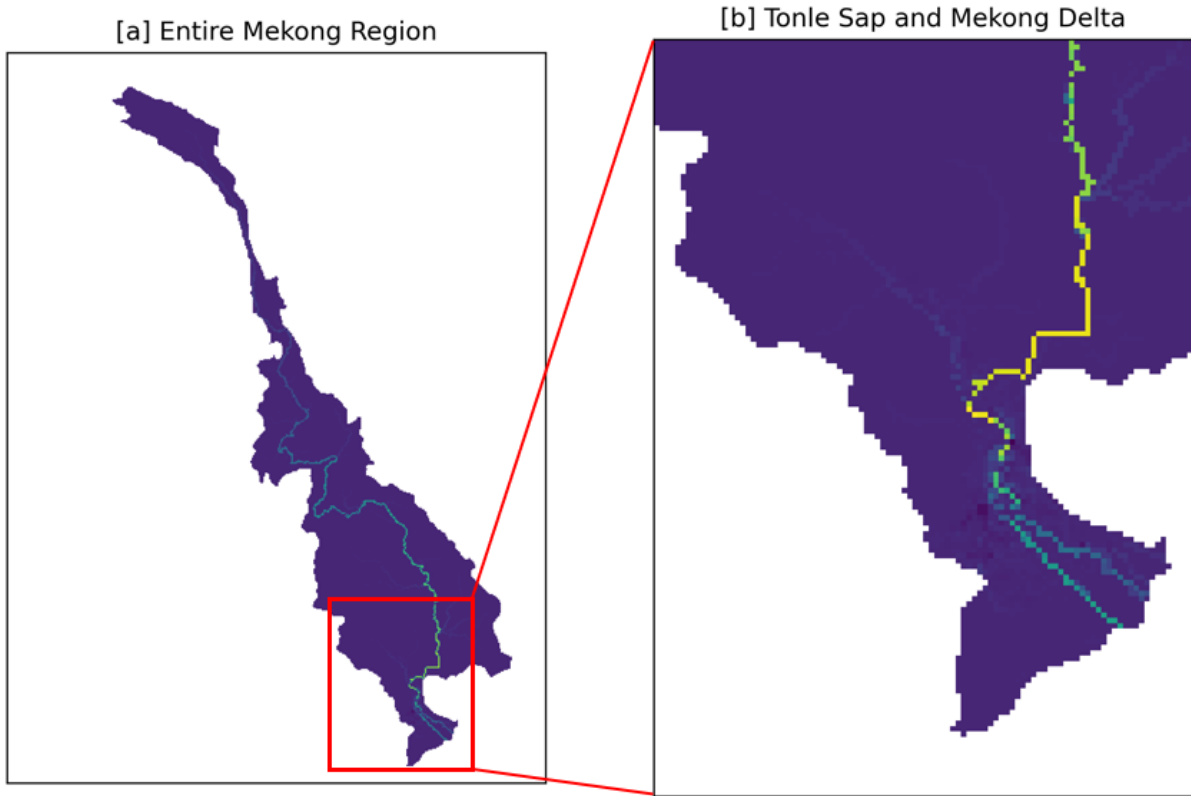

**Figure S14.** Long-term average simulated discharge across the entire Mekong Region and the Tonle Sap, Mekong Delta region.



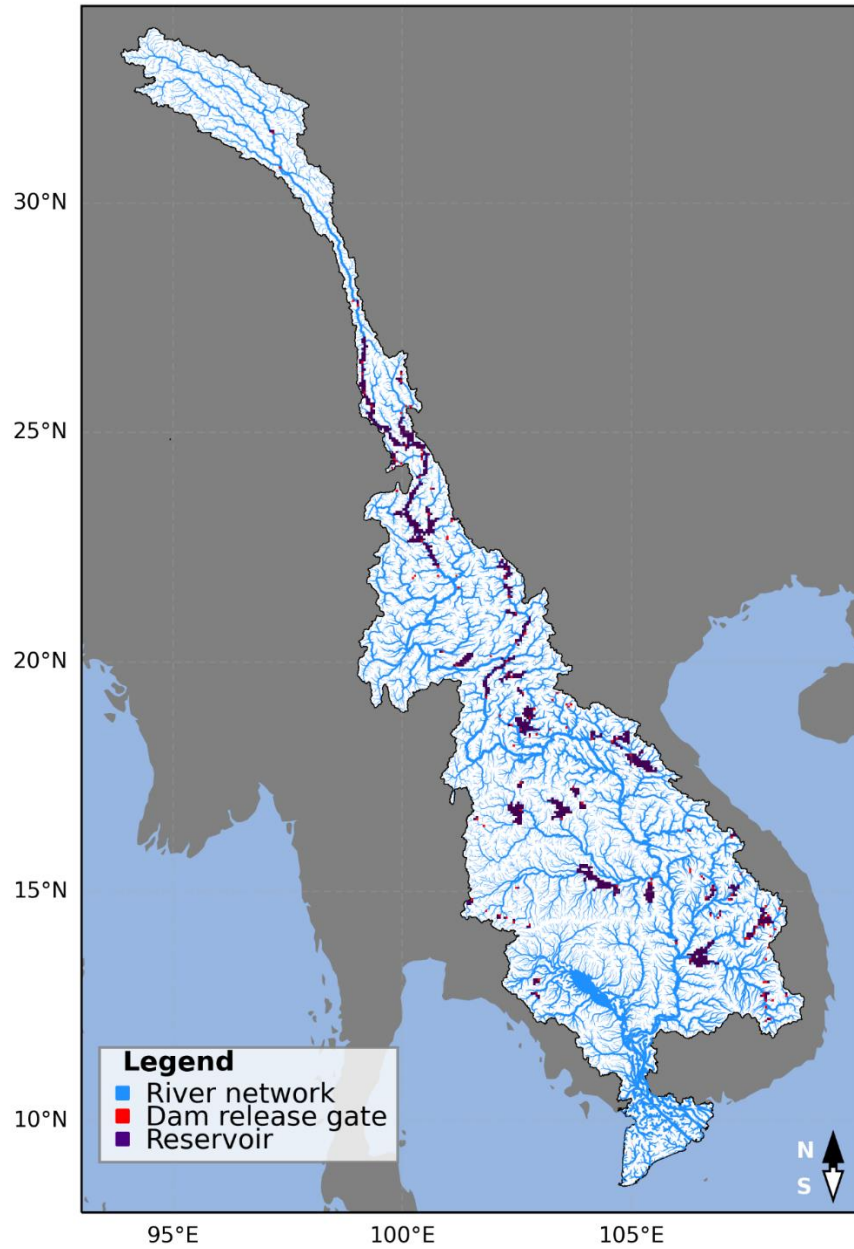

**Fig.S15.** Reservoir extents in model setup for simulations. The river network is indicated in blue lines. Dam release gates are indicated in red while the relevant reservoir extend are indicated in dark purple.
